# Supplementary material
Source: Springer Nature journal article supplement (https://www.springermedizin.de/resource/supplementary/12888_2011_920_MOESM1_ESM.pdf/9478542)
Supplement: MOESM1 [file 9478542]

Care Coordinators  
n = 112 from 23 CMH teams

Care Coordinators randomised to RP  
n = 56 from 12 CMH teams  
**[14 interviewed]**

Care Coordinators randomised to TAU  
n = 56 from 11 CMH teams  
**[7 interviewed]**

SU referred into trial  
n = 56  
**[14 interviewed]**

SU referred into trial  
n = 40  
**[7 interviewed]**

Eligible relative to take part in RP  
n = 38 (68%) **[9 interviewed]**

**1 relative meeting  
eligibility criteria  
interviewed**

Relatives who took part in 6 sessions of  
RP n = 10 (18%)
